# Supplementary material
Source: HighWire-hosted journal article supplement (doi:10.1101/rna.042523.113)
Supplement: SuppFigLegends.docx [file SuppFigLegends.docx]

**Supplementary Information**

**Figure legends**

**Figure 1. RF3 copurifies with GDP and is not removed by EDTA treatment.** HPLC was used to assess the presence of GDP and GTP in purified RF3 before and after EDTA treatment. The displayed traces correspond to samples prepared from: 219Tris buffer (pink), GDP and GTP in 219Tris buffer (green), and both EDTA treated (red) and untreated (blue) RF3 in 219Tris buffer. The assignments for the major peaks (A) on the full chromatogram, and zoomed-in views of the major peaks of interest (B and C) are shown. There are no substantial differences observed in the GDP peak size/area observed in samples prepared from untreated and EDTA treated RF3.

**Figure 2. Measurements of the dissociation of mant-nucleotides from RF3.** The rate of (A) mant-GDP and (B) mant-GTP (5 nM) dissociation from RF3 (200 nM) was monitored in a fluorimeter fluorescence upon the addition of a non-labeled nucleotide (1 mM GDP or GTP) chase. The data were fit to a single phase, and the fit is displayed as a white line. The rates of nucleotide release from RF3 were slow (koff, mantGDP = 0.007 s-1, koff, mantGTP = 0.009 s-1).

**Figure 3. RF1 association with release complexes.** Fluorescein labeled RF1 was titrated with ribosome termination complexes (0- 50 nM). Changes in fluorescence resulting from binding were monitored on a fluorimeter.
